# Supplementary material
Source: publisher figshare collection journal article supplement (https://acs.figshare.com/ndownloader/files/4383310)
Supplement: Supplementary file 1 [file 4383310]

# Supporting Information

for

## **Crystal Structures and Solution Properties of Discrete Complexes Composed of Saddle-Distorted Molybdenum(V)-Dodecaphenylporphyrins and Keggin-Type Heteropolyoxometalates Linked by Direct Coordination**

Atsutoshi Yokoyama,<sup>†</sup> Takahiko Kojima,<sup>‡,\*</sup> Kei Ohkubo,<sup>†</sup> and Shunichi Fukuzumi<sup>†,§,\*</sup>

*Department of Material and Life Science, Division of Advanced Science and Biotechnology, Graduate School of Engineering, Osaka University, Suita, Osaka 565-0871, Department of Chemistry, Graduate School of Pure and Applied Sciences, University of Tsukuba, Tsukuba 305-8571, Japan, and Department of Bioinspired Science, Ewha Womans University, Seoul 120-750, Korea*

<sup>†</sup> Osaka University.

<sup>‡</sup> University of Tsukuba.

<sup>§</sup> Ewha Womans University.

\* To whom correspondence should be addressed.

E-mail: [kojima@chem.tsukuba.ac.jp](mailto:kojima@chem.tsukuba.ac.jp), [fukuzumi@chem.eng.osaka-u.ac.jp](mailto:fukuzumi@chem.eng.osaka-u.ac.jp)

**X-ray Crystallography. X-ray crystallography on 1 and 6:** All measurements were made on a Rigaku Mercury CCD area detector with graphite monochromated Mo-K $\alpha$  radiation. The data were collected at a temperature of  $-170 \pm 1$  (**1**) and  $-150 \pm 1$  (**6**) °C to a maximum  $2\theta$  value of  $55.0^\circ$ . A total of 1240 oscillation images were collected. A sweep of data was done using  $\phi$  scans from  $-80.0$  to  $100.0^\circ$  in  $0.3^\circ$  step, at  $\omega = 0.0^\circ$  and  $\chi = 0.0^\circ$ . The exposure rate was 33.3 sec/deg. The detector swing angle was  $19.80^\circ$ . A second sweep was performed using  $\omega$  scans from  $-20.0$  to  $28.0^\circ$  in  $0.3^\circ$  step, at  $\chi = 90.0^\circ$  and  $\phi = 0.0^\circ$ . The exposure rate was 33.3 sec/deg. The detector swing angle was  $19.80^\circ$ . The crystal-to-detector distance was 44.24 mm. Readout was performed in the 0.273 mm pixel mode. All crystallographic data are summarized in Table S1.

**X-ray crystallography on 5 and 7:** All measurements were made on a Rigaku Mercury CCD area detector with graphite monochromated Mo-K $\alpha$  radiation. The data were collected at a temperature of  $-150 \pm 1^\circ\text{C}$  to the maximum  $2\theta$  value of  $55.0^\circ$ . A total of 720 oscillation images were collected. A sweep of data was done using  $\omega$  scans from  $-70.0$  to  $110.0^\circ$  in  $0.5^\circ$  step, at  $\chi = 45.0^\circ$  and  $\phi = 0.0^\circ$ . The exposure rate was 20.0 (**5**) and 48.0 (**7**) sec/deg. The detector swing angle was  $20.06^\circ$ . A second sweep was performed using  $\omega$  scans from  $-70.0$  to  $110.0^\circ$  in  $0.5^\circ$  step, at  $\chi = 45.0^\circ$  and  $\phi = 90.0^\circ$ . The exposure rate was 20.0 sec/deg. The detector swing angle was  $20.06^\circ$ . The crystal-to-detector distance was 44.54 mm. Readout was performed in the 0.273 mm pixel mode. All crystallographic data are summarized in Table S1.

**Structure Refinements.** Refinement on  $F^2$  was performed for all reflections. The weighted  $R$  factor  $R_w$  and goodness of fit  $S$  are based on  $F^2$ , and the conventional  $R$  factors  $R$  on  $F$ , with  $F$  set to zero for negative  $F^2$ . The threshold expression of  $F^2 > 2\sigma(F^2)$  was used only for calculating  $R$  factors (gt) etc. and was not relevant to the choice of reflections for refinement.  $R$  factors based on  $F^2$  are statistically about twice as large as those based on  $F$ , and  $R$  factors based on all data are even larger. Since the oxygen and tungsten atoms in the Keggin moieties were disordered in the crystals of **5**, **6** and **7**, each

atom was refined isotropically with occupancy of 0.5.

**Table S1.** Crystallographic Data for **1**, **5**, **6** and **7**.

|                                                        | <b>1</b>                                                         | <b>5</b>                                                                                          | <b>6</b>                                                                                           | <b>7</b>                                                                                          |
|--------------------------------------------------------|------------------------------------------------------------------|---------------------------------------------------------------------------------------------------|----------------------------------------------------------------------------------------------------|---------------------------------------------------------------------------------------------------|
| Formula                                                | C <sub>92</sub> H <sub>62</sub> N <sub>4</sub> O <sub>6</sub> Cl | C <sub>184</sub> H <sub>121</sub> N <sub>8</sub> O <sub>42</sub> PMo <sub>2</sub> W <sub>12</sub> | C <sub>184</sub> H <sub>122</sub> N <sub>8</sub> O <sub>42</sub> SiMo <sub>2</sub> W <sub>12</sub> | C <sub>184</sub> H <sub>123</sub> N <sub>8</sub> O <sub>42</sub> BMo <sub>2</sub> W <sub>12</sub> |
| F. W.                                                  | 1699.67                                                          | 5544.95                                                                                           | 5543.07                                                                                            | 5526.80                                                                                           |
| crystal system                                         | triclinic                                                        | monoclinic                                                                                        | monoclinic                                                                                         | monoclinic                                                                                        |
| space group                                            | <i>P</i> -1                                                      | <i>P</i> 2 <sub>1</sub> / <i>n</i>                                                                | <i>C</i> 2/ <i>m</i>                                                                               | <i>P</i> 2 <sub>1</sub> / <i>c</i>                                                                |
| <i>T</i> , K                                           | 103                                                              | 123                                                                                               | 123                                                                                                | 123                                                                                               |
| <i>a</i> , Å                                           | 15.901(6)                                                        | 17.607(15)                                                                                        | 18.4212(11)                                                                                        | 17.750(5)                                                                                         |
| <i>b</i> , Å                                           | 16.509(6)                                                        | 37.654(10)                                                                                        | 37.5328(17)                                                                                        | 37.319(9)                                                                                         |
| <i>c</i> , Å                                           | 18.453(7)                                                        | 18.227(5)                                                                                         | 17.8126(11)                                                                                        | 18.393(5)                                                                                         |
| $\alpha$ , deg.                                        | 104.143(3)                                                       | —                                                                                                 | —                                                                                                  | —                                                                                                 |
| $\beta$ , deg.                                         | 108.391(3)                                                       | 118.664(4)                                                                                        | 118.897(2)                                                                                         | 118.6632(11)                                                                                      |
| $\gamma$ , deg.                                        | 109.915(3)                                                       | —                                                                                                 | —                                                                                                  | —                                                                                                 |
| <i>V</i> , Å <sup>3</sup>                              | 3972(3)                                                          | 10605(5)                                                                                          | 10782(10)                                                                                          | 10691(5)                                                                                          |
| <i>Z</i>                                               | 2                                                                | 2                                                                                                 | 2                                                                                                  | 2                                                                                                 |
| No. of reflections                                     | 30844                                                            | 75582                                                                                             | 33298                                                                                              | 74601                                                                                             |
| No. of observations                                    | 17703                                                            | 23851                                                                                             | 9879                                                                                               | 23451                                                                                             |
| No. of parameters                                      | 1019                                                             | 1099                                                                                              | 560                                                                                                | 1099                                                                                              |
| <i>R</i> 1 <sup>a</sup> ( <i>I</i> > 2.0σ( <i>I</i> )) | 0.123                                                            | 0.135 (0.072°)                                                                                    | 0.077                                                                                              | 0.158 (0.088°)                                                                                    |
| <i>wR</i> 2 <sup>b</sup> (all data)                    | 0.338                                                            | 0.239 (0.143°)                                                                                    | 0.165                                                                                              | 0.313 (0.236°)                                                                                    |
| GOF                                                    | 1.130                                                            | 1.51 (1.08°)                                                                                      | 1.11                                                                                               | 1.30 (1.08°)                                                                                      |

<sup>a</sup>  $R1 = \sum |F_o| - |F_c| / \sum |F_o|$ .<sup>b</sup>  $wR2 = [\sum (w(F_o^2 - F_c^2)^2) / \sum w(F_o^2)^2]^{1/2}$ .<sup>c</sup> Structure refinements using the “Squeeze” method.

(a)

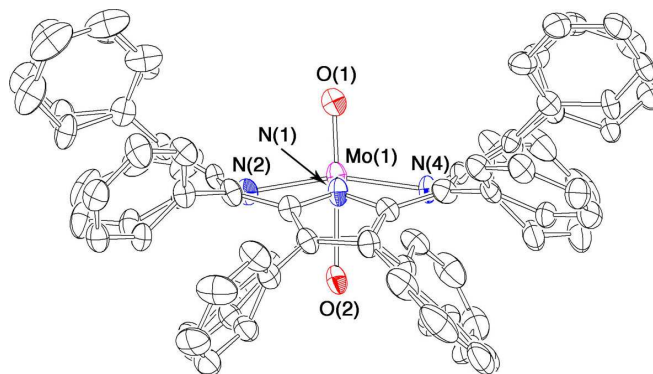

(b)

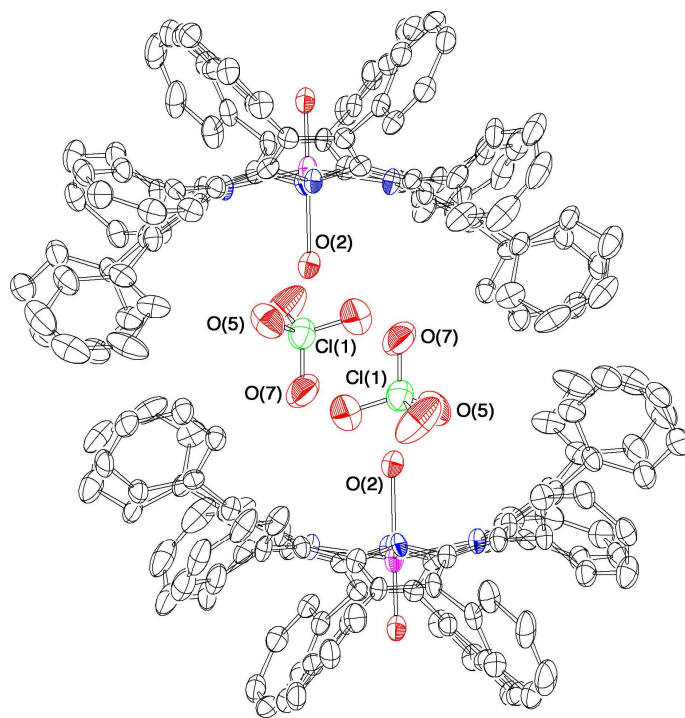

**Figure S1.** Crystal Structures of  $[\text{Mo}(\text{DPP})(\text{O})(\text{H}_2\text{O})]\text{ClO}_4$  (**1**) with 50% probability thermal ellipsoids.

(a)

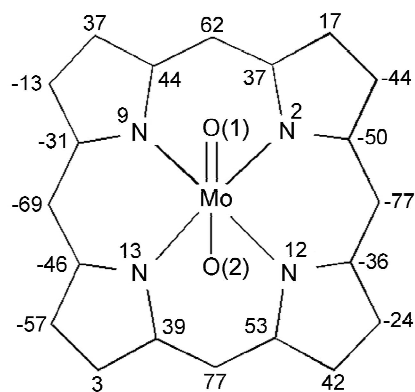

(b)

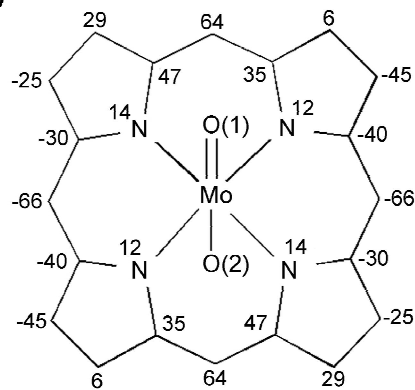

(c)

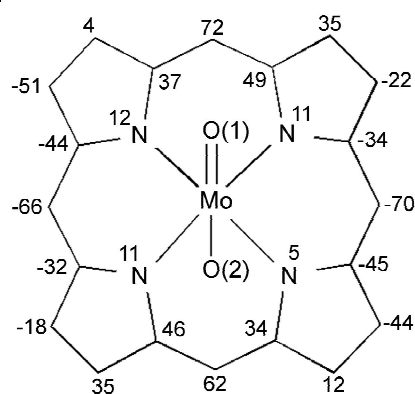

**Figure S2.** The displacement of each atom from the least-squares mean plane of 24 atoms of the DPP moiety in **5(a)**, **6(b)** and **7(c)** (in units of 0.01 Å).

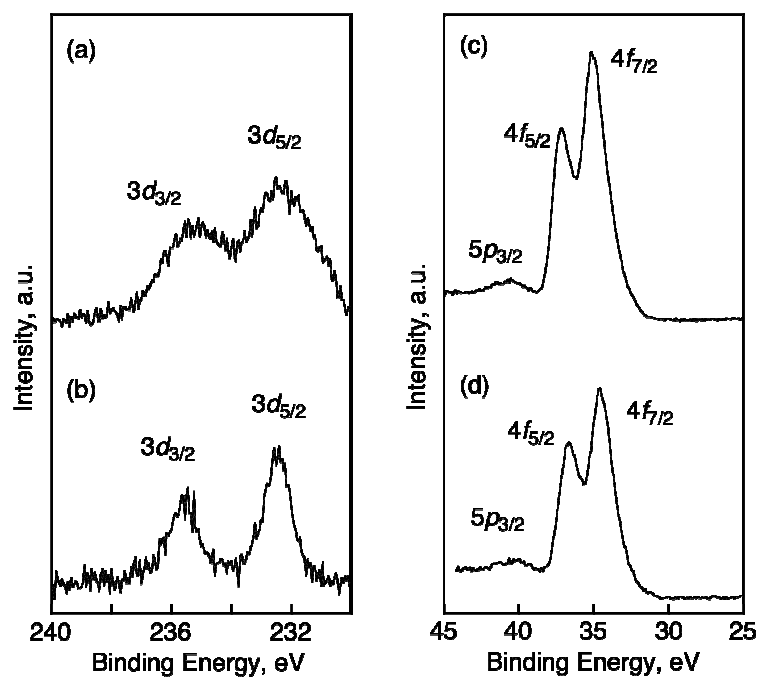

**Figure S3.** XPS spectra of **1**(a), **3**(c) and **6**(b),(d) in boron nitride pellets. Spectra of (a) and (b) are assigned to Molybdenum atom ( $3d_{3/2}$ ,  $3d_{5/2}$ ). (c) and (d) are assigned to tungsten atom ( $5p_{3/2}$ ,  $4f_{5/2}$ ,  $4f_{7/2}$ ).

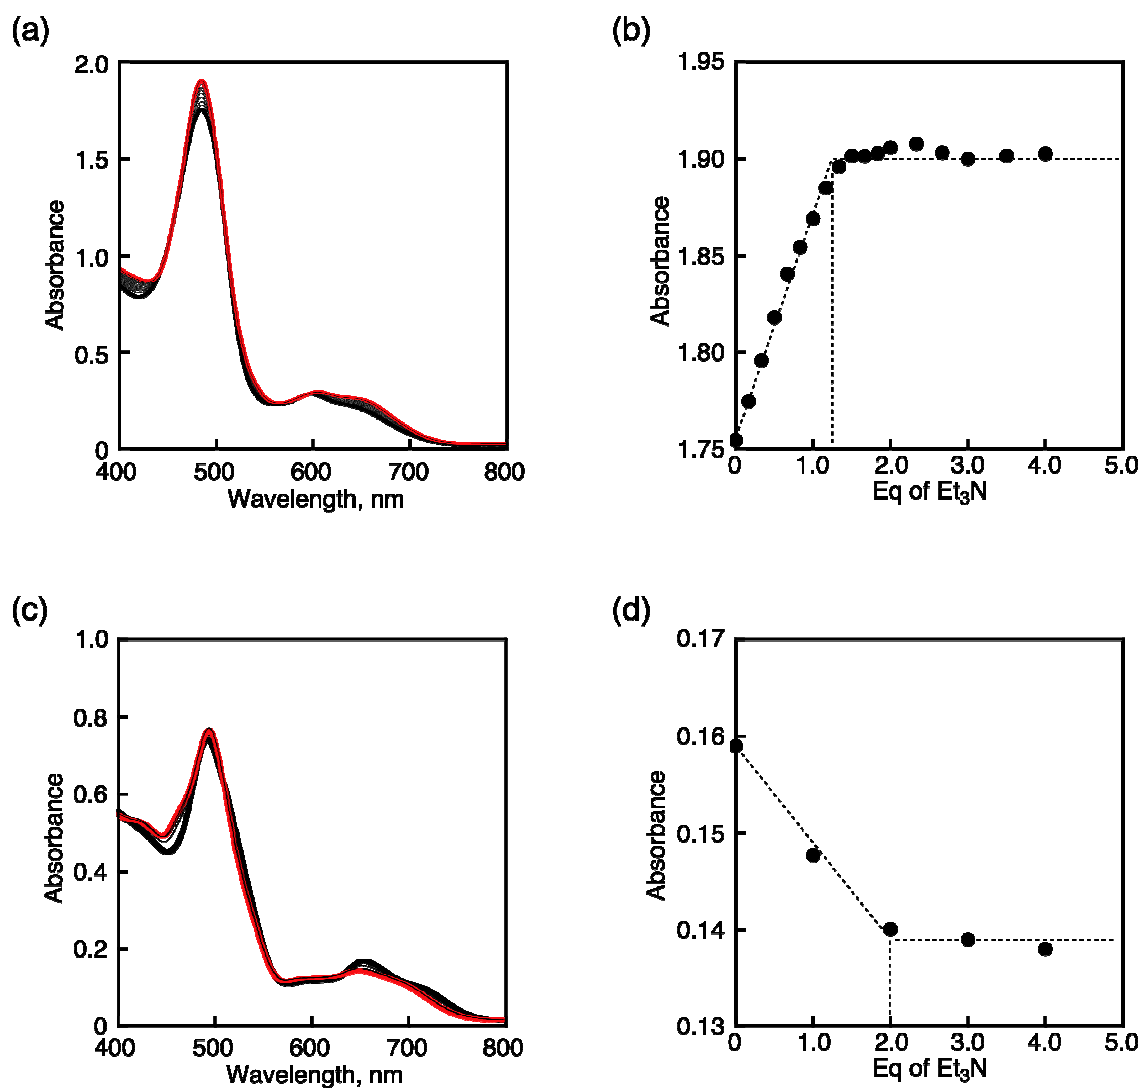

**Figure S4.** UV-vis spectral changes of (a) **5** ( $1.0 \times 10^{-5}$  M) and (c) **6** ( $1.0 \times 10^{-5}$  M) upon addition of triethylamine (1 mM). Changes of absorbance at 484.5 nm for **5** (b) and 653 nm for **6** (d) are depicted.



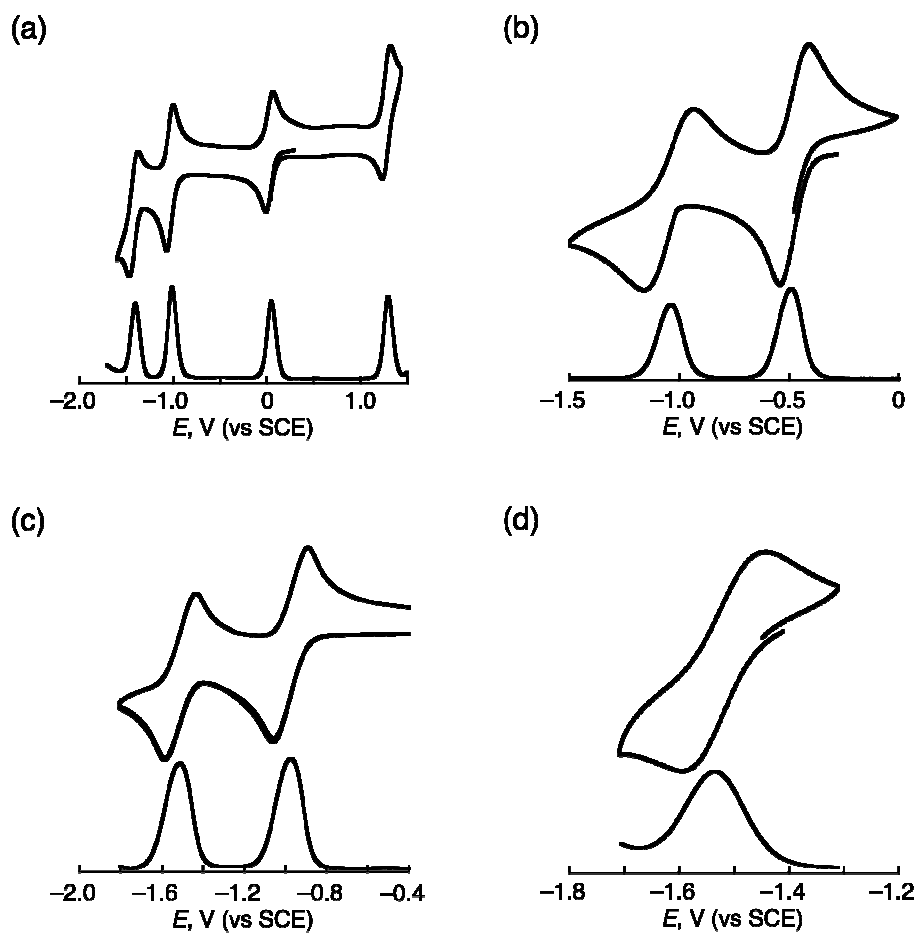

**Figure S5.** Cyclic voltammograms and differential plus voltammograms for **1**(a), **2**(b), **3**(c), and **4**(d) in PhCN at room temperature under Ar in the presence of 0.1 M TBAPF<sub>6</sub> as an electrolyte.
